# Supplementary material for: One-step electrodeposition of cerium-doped nickel hydroxide nanosheets for effective oxygen generation
Source: Royal Society of Chemistry journal article supplement (doi:10.1039/c9ra02682g), 2019-01-01
Supplement: c9ra02682g1.pdf [file c9ra02682g1.pdf]

**One-step electrodeposition of Cerium-doped nickel hydroxide nanosheets for effective oxygen generation**

Gang Fang,<sup>a</sup> Jinhua Cai<sup>b</sup> and Zhipeng Huang<sup>c\*</sup>

- a. School of chemistry and chemical engineering, Jiangsu University, Zhenjiang, 212013, PR China.*
  - b. College of Chemistry & Chemical Engineering, Jinggangshan University, Jian, Jiangxi Province 343009, P. R. China.*
  - c. School of Chemical Science and Engineering, Tongji University, Shanghai, 200092, PR China.*
- Corresponding author. Zhipeng Huang (zphuang-tongji.edu.cn)*

Electronic Supplementary Information (ESI)

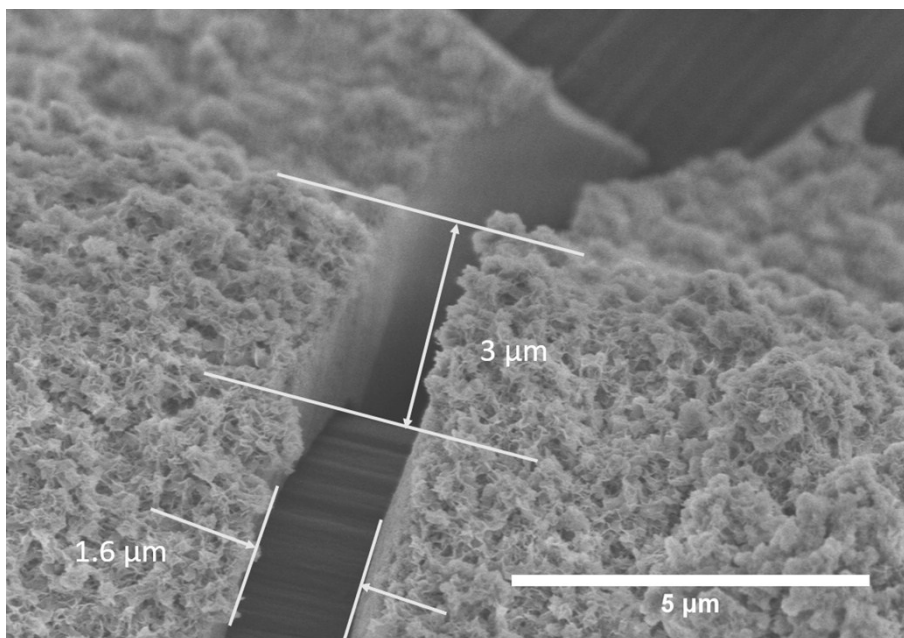

**Figure S1.** SEM images of  $\text{Ni(OH)}_2 \cdot 0.75\text{H}_2\text{O-CeO}_2$  NSs.

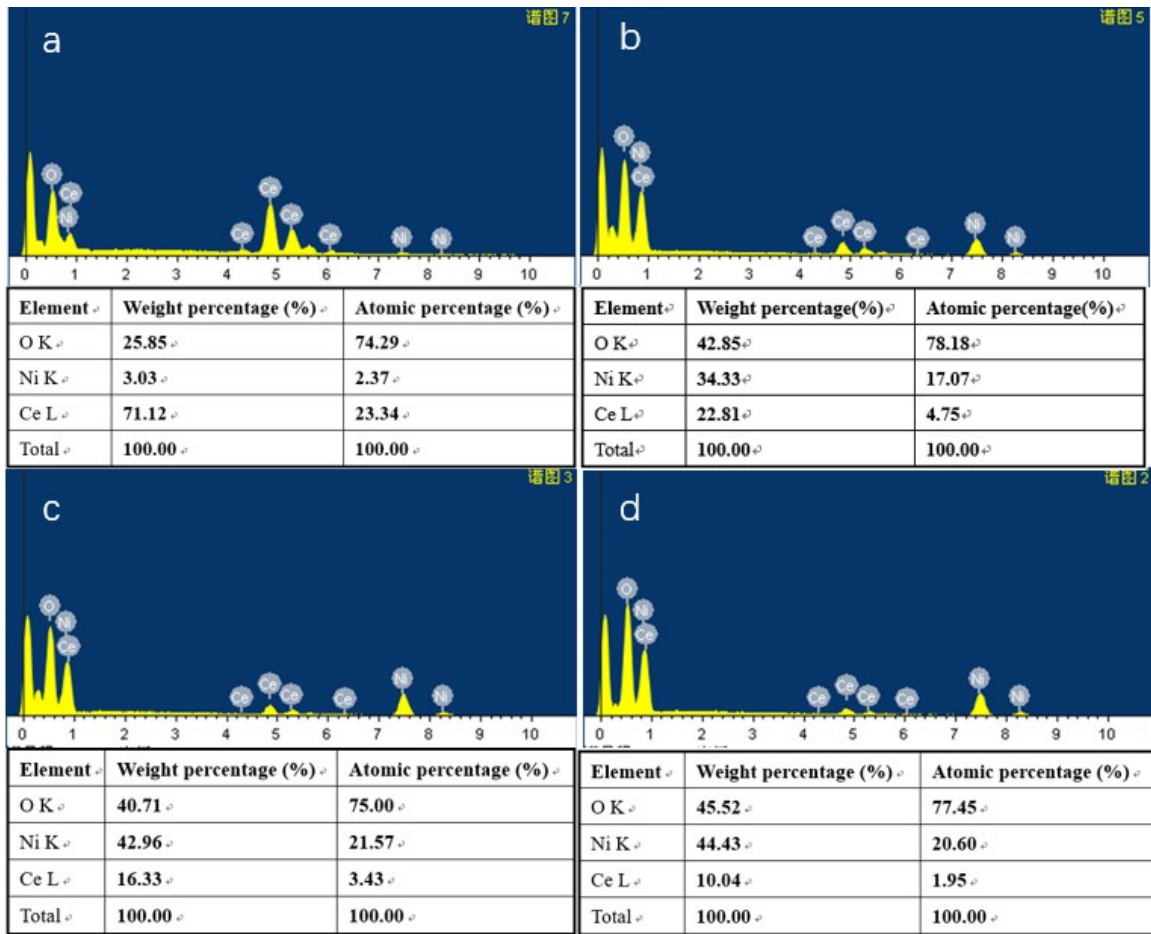

**Figure S2.** EDX spectrum and element content of (a)  $\text{Ni(OH)}_2 \cdot 0.75\text{H}_2\text{O} \cdot \text{CeO}_2(2.5:1)$ , (b)  $\text{Ni(OH)}_2 \cdot 0.75\text{H}_2\text{O} \cdot \text{CeO}_2(10:1)$ , (c)  $\text{Ni(OH)}_2 \cdot 0.75\text{H}_2\text{O} \cdot \text{CeO}_2(30:1)$ , and (d)  $\text{Ni(OH)}_2 \cdot 0.75\text{H}_2\text{O} \cdot \text{CeO}_2(40:1)$ .

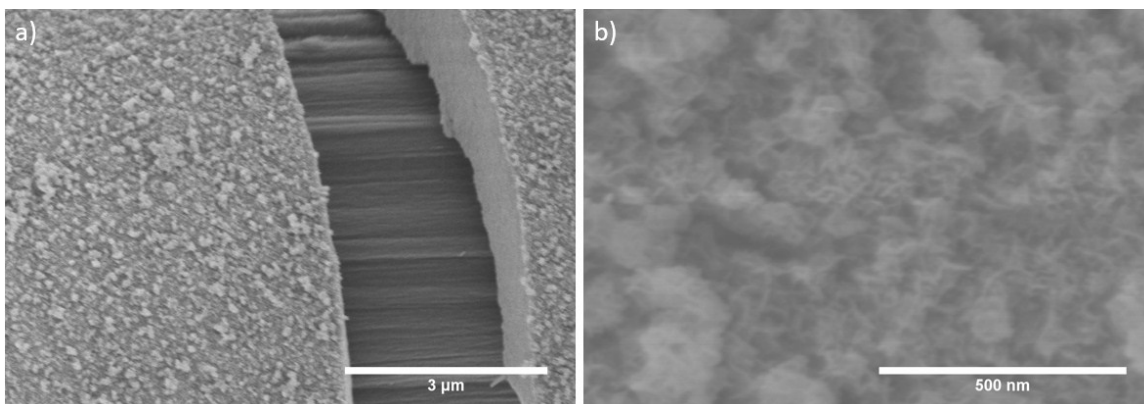

**Figure S3.** SEM images of  $\text{Ni}(\text{OH})_2 \cdot 0.75\text{H}_2\text{O}$  NSs.

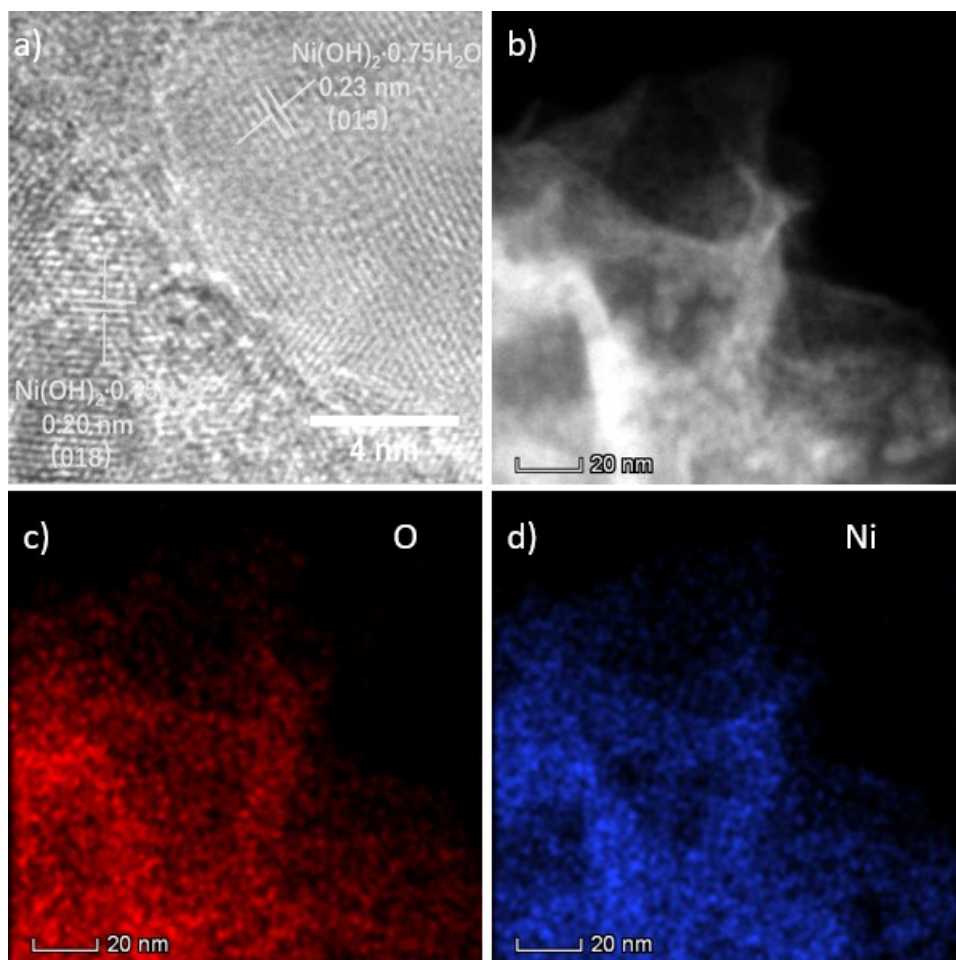

**Figure S4.** (a) HRTEM images of  $\text{Ni(OH)}_2 \cdot 0.75\text{H}_2\text{O}$ , (b) Dark-field STEM image of  $\text{Ni(OH)}_2 \cdot 0.75\text{H}_2\text{O}$  and corresponding elemental mapping images of (c) O, (d) Ni.

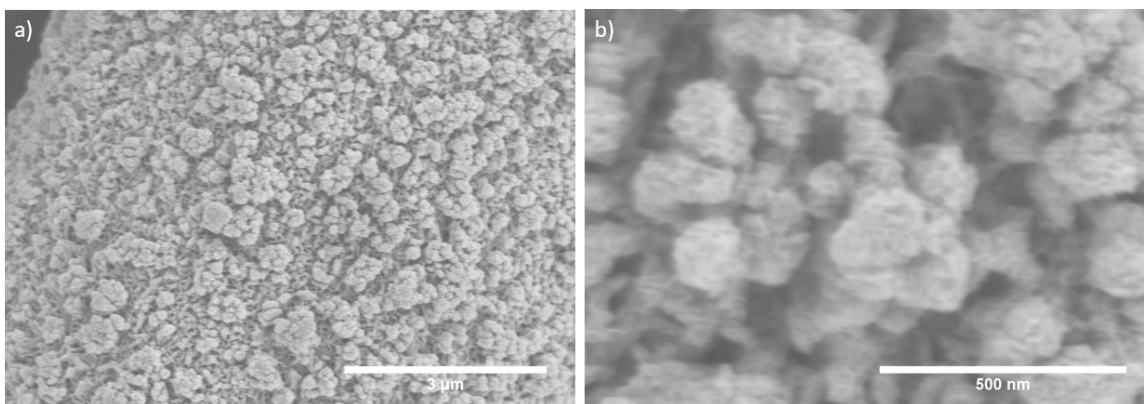

**Figure S5.** (a, b) SEM images of  $\text{Ni(OH)}_2 \cdot 0.75\text{H}_2\text{O}-\text{CeO}_2(30:1)$  NSs subjected to long-term potentiostatic electrolysis.

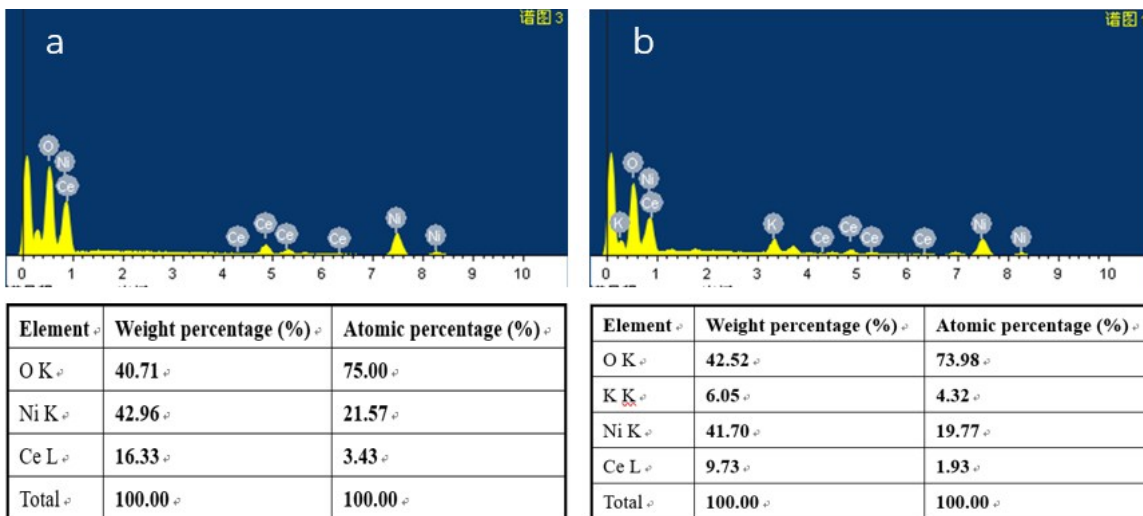

**Figure S6.** EDX spectrum and element content of (a)  $\text{Ni}(\text{OH})_2 \cdot 0.75\text{H}_2\text{O} \cdot \text{CeO}_2(30:1)$ , (b)  $\text{Ni}(\text{OH})_2 \cdot 0.75\text{H}_2\text{O} \cdot \text{CeO}_2(30:1)$  subjected to long-term potentiostatic electrolysis.

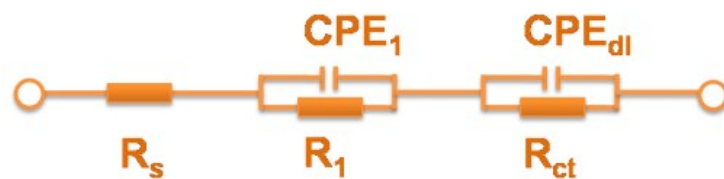

**Figure S7.** Equivalent circuit used to fit the EIS data.  $R_0$  is series resistance,  $CPE_1$  and  $R_1$  are the constant phase element and the resistance describing electron transport at the substrate/catalyst interface, respectively,  $CPE_{dl}$  is the constant phase element of the catalyst/electrolyte interface, and  $R_{ct}$  is the charge-transfer resistance at the catalyst/electrolyte interface.



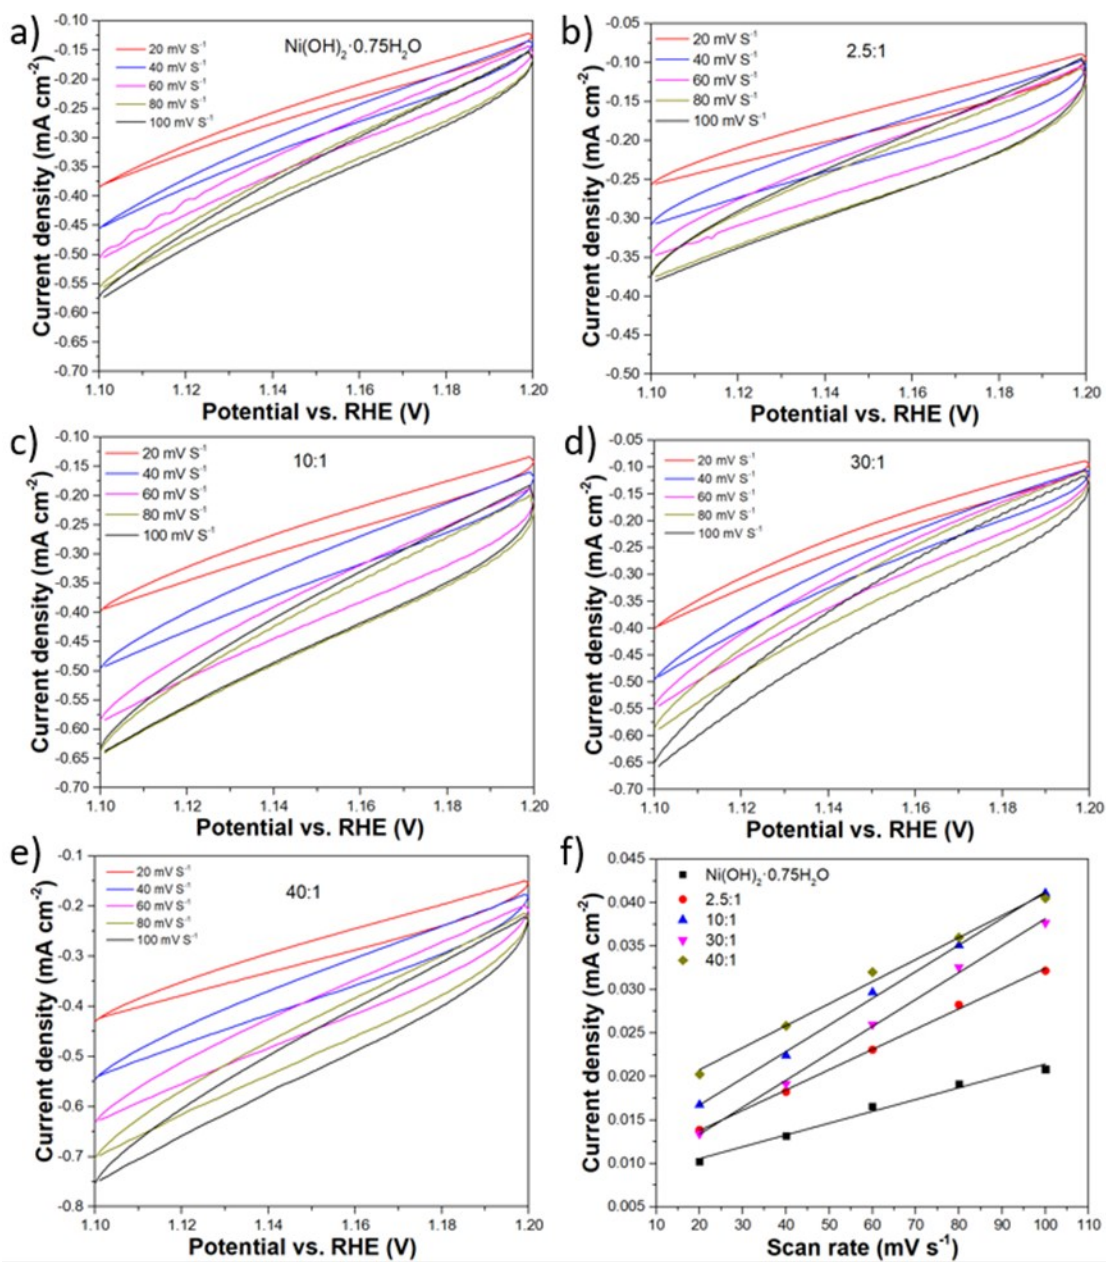

**Figure S8.** (a, b, c, d, and e) CV of  $\text{Ni(OH)}_2 \cdot 0.75\text{H}_2\text{O}$ ,  $\text{Ni(OH)}_2 \cdot 0.75\text{H}_2\text{O}-\text{CeO}_2(2.5:1)$ ,  $\text{Ni(OH)}_2 \cdot 0.75\text{H}_2\text{O}-\text{CeO}_2(10:1)$ ,  $\text{Ni(OH)}_2 \cdot 0.75\text{H}_2\text{O}-\text{CeO}_2(30:1)$ , and  $\text{Ni(OH)}_2 \cdot 0.75\text{H}_2\text{O}-\text{CeO}_2(40:1)$  measured with different scan rates. (f) the measured capacitive currents plotted as a function of scan rate.

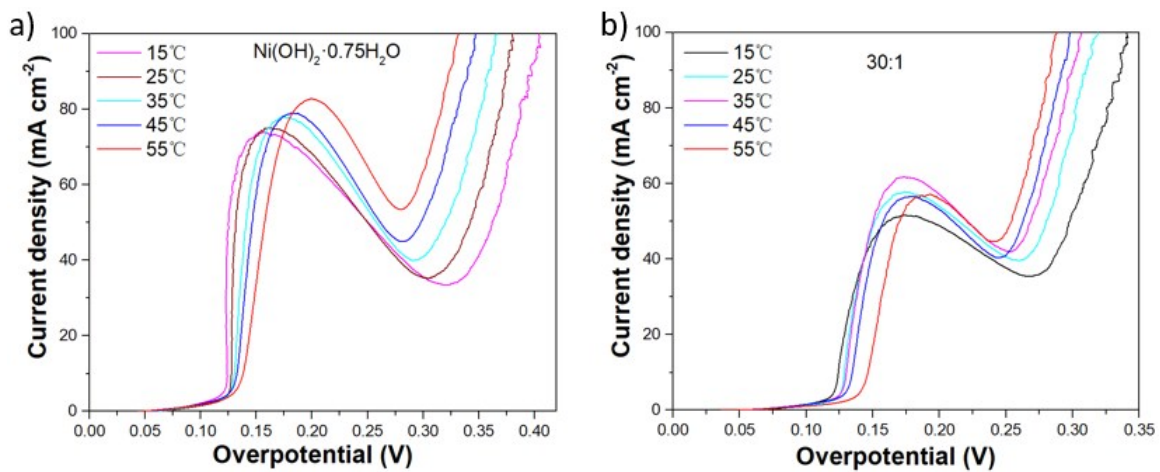

**Figure S9.** Temperature dependent polarization curves of (a) Ni(OH)<sub>2</sub>·0.75H<sub>2</sub>O and (b) Ni(OH)<sub>2</sub>·0.75H<sub>2</sub>O-CeO<sub>2</sub>(30:1).

**Table S1.** Composition determined by ICP of synthesized catalysts.

Method: Weigh a certain amount of sample, add 10ml of aqua regia, heat the plate to heat digestion at about 200 degrees, add aqua regia when steaming dry, the general digestion time is 3-4 h, then filter out the carbon fiber paper. Dilute the solution and determine the volume, and then perform ICP analysis.

| Sample(3 cm <sup>2</sup> )                                             | The sample quantity(g) | Volume of digestion liquid(mL) | Concentration of Ni in digestion liquid(mg/L) | Concentration of Ce in digestion liquid(mg/L) | Dilution ratio | Atomic ratio of Ni:Ce | Mass loading (mg cm <sup>-2</sup> ) |
|------------------------------------------------------------------------|------------------------|--------------------------------|-----------------------------------------------|-----------------------------------------------|----------------|-----------------------|-------------------------------------|
| Ni(OH) <sub>2</sub> ·0.75H <sub>2</sub> O-CeO <sub>2</sub> NSs (2.5:1) | 0.0834                 | 25                             | 2.89                                          | 6.29                                          | 100            | 1.1:1                 | 6.8                                 |
| Ni(OH) <sub>2</sub> ·0.75H <sub>2</sub> O-CeO <sub>2</sub> NSs (10:1)  | 0.0728                 | 25                             | 1.62                                          | 1.70                                          | 100            | 2.27:1                | 4.2                                 |
| Ni(OH) <sub>2</sub> ·0.75H <sub>2</sub> O-CeO <sub>2</sub> NSs (30:1)  | 0.0782                 | 25                             | 3.05                                          | 2.80                                          | 100            | 2.6:1                 | 7.5                                 |
| Ni(OH) <sub>2</sub> ·0.75H <sub>2</sub> O-CeO <sub>2</sub> NSs (40:1)  | 0.0796                 | 25                             | 2.80                                          | 1.63                                          | 100            | 4.1:1                 | 5.9                                 |
| Ni(OH) <sub>2</sub> ·0.75H <sub>2</sub> O NSs                          | 0.0815                 | 25                             | 3.53                                          | 0                                             | 100            | ---                   | 5.3                                 |

**Table S2.** Performance of typical reported cerium doped OER electrocatalysts in alkaline media.

| Electrocatalysts                                                       | $\eta_{10}$<br>(mV) | $\eta_{20}$<br>(mV) | $\eta_{100}$<br>(mV) | Tafel slope<br>(mV dec <sup>-1</sup> ) | Electrolyte<br>(M KOH) |
|------------------------------------------------------------------------|---------------------|---------------------|----------------------|----------------------------------------|------------------------|
| Ni(OH) <sub>2</sub> ·0.75H <sub>2</sub> O-CeO <sub>2</sub> (This work) |                     |                     | 320                  | 126                                    | 1.0                    |
| CeO <sub>2</sub> /CoSe <sub>2</sub> <sup>[1]</sup>                     | 288                 | 324                 |                      | 41                                     | 0.1                    |
| Ce-NiO-E <sup>[2]</sup>                                                | 382                 |                     |                      | 118.7                                  | 1.0                    |
| Ce-NiO-L <sup>[2]</sup>                                                | 426                 |                     |                      | 131.6                                  | 1.0                    |
| Ni <sub>4</sub> Ce <sub>1</sub> -CP <sup>[3]</sup>                     | 220                 |                     |                      | 81.9                                   | 1.0                    |
| NiFeO <sub>x</sub> H <sub>y</sub> <sup>[4]</sup>                       | 207                 |                     |                      | 25                                     | 1.0                    |
| NiFeO <sub>x</sub> H <sub>y</sub> /G <sup>[4]</sup>                    | 177                 |                     |                      | 22                                     | 1.0                    |
| NiCeO <sub>x</sub> -Au <sup>[5]</sup>                                  | 290                 |                     |                      | -                                      | 1.0                    |
| CeO <sub>2</sub> /FeOOH HLNTs-NF <sup>[6]</sup>                        |                     |                     | 330                  | 92.3                                   | 1.0                    |
| CoO <sub>x</sub> (Ce) <sup>[7]</sup>                                   | 229                 | 261                 | 302                  | 63.7                                   | 1.0                    |

**Table S3.** Values of equivalent circuit elements resulted from fitting of EIS data.

| Sample                                    | $R_s$<br>( $\Omega$ ) | $Q_1$<br>( $F\ cm^{-2}\ S^{n-1}$ ) | $n_1$  | $R_1$<br>( $\Omega$ ) | $Q_{dl}$<br>( $F\ cm^{-2}\ S^{n-1}$ ) | $n_{dl}$ | $R_{ct}$<br>( $\Omega$ ) |
|-------------------------------------------|-----------------------|------------------------------------|--------|-----------------------|---------------------------------------|----------|--------------------------|
| Ni(OH) <sub>2</sub> ·0.75H <sub>2</sub> O | 2.844                 | 0.6394                             | 0.9857 | 4.828                 | 0.7936                                | 0.3966   | 1.317                    |
| 2.5:1                                     | 2.674                 | 0.1635                             | 0.6863 | 3.631                 | 0.0468                                | 0.3325   | 1.177                    |
| 10:1                                      | 3.133                 | 0.749                              | 0.793  | 1.784                 | 0.4334                                | 0.1924   | 0.928                    |
| 30:1                                      | 2.853                 | 0.7328                             | 0.9598 | 1.678                 | 0.6619                                | 0.3177   | 0.8654                   |
| 40:1                                      | 3.395                 | 0.6881                             | 0.9581 | 2.383                 | 0.294                                 | 0.4829   | 0.948                    |

## References

- [1] Y. R. Zheng, M. R. Gao, Q. Gao, H. H. Li, J. Xu, Z. Y. Wu and S. H. Yu, *Small*, 2015, 11, 182-188.
- [2] W. Gao, Z. M. Xia, F. X. Cao, J. C. Ho, Z. Jiang, Y. Q. Qu, *Adv. Funct. Mater*, 2018, 28, 1706056.
- [3] D. Zhao, Y. Pi, Q. Shao, Y. Feng, Y. Zhang, and X. Huang, *ACS nano*, 12(6), 6245-6251.
- [4] Z. Yan, H. Sun, X. Chen, H. Liu, Y. Zhao, H. Li, ... and J. Chen, *Nat. commun.*, 2018, 9(1), 2373.
- [5] J. W. D. Ng, M. García-Melchor, M. Bajdich, P. Chakthranont, C. Kirk, A. Vojvodic, T. F. Jaramillo, *Nat. Energy*, 2016, 1(5), 16053.
- [6] J. X. Feng, S. H. Ye, H. Xu, Y. X. Tong, and G. R. Li, *Adv. Mater*, 2016, 28(23), 4698-4703.
- [7] S. Xu, C. Lv, T. He, Z. Huang, and C. Zhang, *J. Mater. Chem. A*, 2019, 7, 7526-7532.
